# Supplementary material for: Alkaline intracellular pH (pHi) activates AMPK–mTORC2 signaling to promote cell survival during growth factor limitation
Source: J Biol Chem. 2021 Aug 19;297(4):101100. doi: 10.1016/j.jbc.2021.101100 (PMC8479482; doi:10.1016/j.jbc.2021.101100)

## Supporting Information

Kazyken *et al.*

### Alkaline intracellular pH (pHi) activates AMPK-mTORC2 signaling to promote cell survival during growth factor limitation

## Supplemental Experimental Procedures

### Materials

General chemicals were from Thermo Fisher Scientific or Sigma Aldrich. NP40, Brij35, and CHAPS detergents were from Pierce; cOmplete Protease Inhibitor Cocktail (EDTA-free) tablets were from Millipore Sigma (#11836170001); protein A-Sepharose CL-4B was from Sigma-Aldrich (#17-0780-01); Immobilon-P polyvinylidene difluoride (PVDF) membrane (0.45  $\mu$ M) was from Millipore; reagents for enhanced chemiluminescence (ECL) were from Alkali Scientific (Bright Star #XR92) or Advansta (WesternBright Sirius HRP substrate);  $\text{NH}_4\text{Cl}$  was from Fisher (#A661); ST0-609 was from Cayman (#1532510); PageRuler (#26617) and PageRuler Plus (#26619) prestained protein ladders, as well as Bapta-AM (#B1205), were from Thermo Fisher.

### Antibodies

The following antibodies were from Cell Signaling Technology (CST): AMPK $\alpha$  P-T172 (#4188); pan-AMPK $\alpha$  (#2532); Akt P-S473 (#4060); Akt P-T308 (#4056); Akt (#9272); mTOR (#2972); raptor P-S792 (#2083); raptor (#2280); S6K1 P-T389 (#9234); ACC P-S79 (#3661); ACC (#3676); Bad P-S136 (#4366); cleaved caspase 3 (#9664); cleaved PARP (#9544);  $\alpha$ -tubulin (#2144); mTOR P-S2481 was from Millipore (#09-343). The following custom polyclonal anti-peptide antibodies were generated by us with the aid of Covance, as described previously (1): mTOR P- S1261 (amino acids 1256-1266; rat); Rictor (amino acids 6-20; human); and S6K1 (amino acids 485-502; rat 70 kDa isoform). Donkey anti-rabbit-HRP secondary antibody was from Jackson (#711-095-152).

### Drug treatments, cell lysis, immunoprecipitation, and western blotting

Cells were pre-treated with Torin1 [100 nM] (30 min.) (shared by D. Sabatini, MIT and Whitehead Institute, Boston, MA) or cariporide [10  $\mu$ M] (30 min.) (Sigma #SML1360) prior to lysis. Unless otherwise indicated, cells were washed 2x in PBS and lysed in buffer containing NP-40 [0.5%] and Brij35 [0.1%], as described (1). Lysates were incubated on ice (15 min.) and then spun at 13,200 rpm (5 min.) at 4°C. Post-nuclear supernatants were normalized for protein levels by Bradford assay. For immunoprecipitation, whole cell lysates were incubated with antibodies for 2 hr. at 4°C and Protein A-Sepharose beads for 1 hr. Beads were washed three times in lysis buffer and resuspended in 1x sample buffer. Samples were resolved on SDS-PAGE and transferred to PVDF membranes in Towbin transfer buffer containing 0.02% SDS. Western blotting was performed by blocking PVDF membranes in Tris-buffered saline (TBS) pH 7.5 with 0.1% Tween-20 (TBST) containing 3% non-fat dry milk, as described, and incubating the membranes in TBST/ BSA (2%) containing primary or secondary HRP antibodies. Blots were developed by ECL and detected digitally with a Chemi-Doc-It System (UVP).

### mTORC2 *in vitro* kinase assays

mTORC2 *in vitro* kinase (IVK) assays were performed, as described (2,3). Briefly, serum starved MEFs were re-fed with DMEM pH 7.4 or pH 8.3 and lysed in buffer containing CHAPS [0.3%]. Rictor was immunoprecipitated from a near confluent 10 cm plate and incubated with ATP [250  $\mu$ M] and recombinant His-Akt1 [100 ng/reaction] (Millipore #14-279) in 15  $\mu$ l kinase buffer (25 mM HEPES; 100 mM potassium acetate; 1 mM  $\text{MgCl}_2$ ) at 30°C for 30 min. and stopped by addition of sample buffer followed by incubation at 95°C for 10 min.

### Image editing

Adobe Photoshop was used for preparation of western blot images, using only levels, brightness, and/or contrast equivalently over the entire image. All presented images reflect the raw images.

### Statistical analysis

Fiji was used to quantitate ECL western blot signals. Results are presented as mean  $\pm$  SD. Significance of the difference between two measurements was determined by Student's t test. Multiple comparisons were analyzed for significance using one-way ANOVA followed by pairwise Tukey's post hoc tests. Values of  $p < 0.05$  were considered significant. All experiments were performed at least three times, if not more, unless indicated otherwise in the figure legend.

### Supplementary Figure Legends

#### **Supplementary Figure S1: Activation of mTORC2 signaling by alkaline extracellular pH in C2C12 myoblasts** (related to figure 1)

**S1A.** C2C12 cells were serum and amino acid starved overnight (~16 hrs.) in HBSS and stimulated with an amino acid solution at pH 7.4 or pH 10 to 1x final (10 min.). Whole cell lysates were immunoblotted as indicated.

**S1B.** C2C12 cells were serum starved overnight in DMEM (~16 hrs.), shifted to amino acid-free DMEM lacking FBS (50 min), and then stimulated with an amino acid solution at pH 7.4 or pH 10 to 1x final (10 min).

#### **Supplementary Figure S2: Alkaline extracellular pH increases mTORC2 signaling in HEK293T and U2OS cells** (related to figure 2)

**S2A.** HEK293T cells were re-fed with complete media (DMEM/FBS) (30 min) and then re-fed again with the same media at pH 7.4 or 8.3 for various times (0-60 min). Whole cell lysates were immunoblotted as indicated.

**S2B.** HEK293T cells were pre-treated without or with Torin1 (T) or cariporide (C) (30 min.) and re-fed with complete media (DMEM/FBS) at pH 7.4 or 8.3 (15 min) without or with drugs.

**S2C.** U2OS cells were treated as in **C**.

**S2D.** MEFs in complete media (DMEM/FBS) were re-fed with media at various pH values (pH 7.4-9.0) (10 min).

#### **Supplementary Figure S3. AMPK suppresses apoptosis in response to alkaline extracellular pH:**

WT and AMPK $\alpha 1/\alpha 2$  DKO MEFs cultured in complete media (CM) (DMEM/+FBS) or serum-free media (SFM) (DMEM/-FBS) for 16 hrs. were re-fed with CM at pH 7.4 or SFM at pH 7.4 or 7.8 without or with Torin1 (T) for an additional 3 hrs. (19 hrs. total). Graph, mean ratio  $\pm$  SD of cCasp3/ tubulin.  $n = 4$  experiments. \* $p < 0.05$ , n.s., not significant, using one-way ANOVA and Tukey's post hoc tests.

#### **Supplementary Figure S4. CaMKK $\beta$ inhibition or Ca<sup>2+</sup> chelation reduces mTORC2 signaling in response to alkaline extracellular pH:**

**S4A.** LKB1<sup>-/-</sup> MEFs in complete media (DMEM/+FBS) were pre-treated without (DMSO) or with ST0-609 (30 min.) and re-fed with the same media at pH 7.4 or 8.3 (10 min.) lacking or containing ST0-609. Whole cell lysates were immunoblotted as indicated.

**S4B.** Similar to S4A, except cells were pre-treated and re-fed with complete media lacking (DMSO) or containing Bapta-AM (T).

### Supplementary References

1. Acosta-Jaquez, H. A., Keller, J. A., Foster, K. G., Ekim, B., Soliman, G. A., Feener, E. P., Ballif, B. A., andingar, D. C. (2009) Site-specific mTOR phosphorylation promotes mTORC1-mediated signaling and cell growth. *Mol Cell Biol* **29**, 4308-4324
2. Huang, J., Dibble, C. C., Matsuzaki, M., and Manning, B. D. (2008) The TSC1-TSC2 complex is required for proper activation of mTOR complex 2. *Mol Cell Biol* **28**, 4104-4115

3. Kazyken, D., Magnuson, B., Bodur, C., Acosta-Jaquez, H. A., Zhang, D., Tong, X., Barnes, T. M., Steinl, G. K., Patterson, N. E., Altheim, C. H., Sharma, N., Inoki, K., Cartee, G. D., Bridges, D., Yin, L., Riddle, S. M., and Fingar, D. C. (2019) AMPK directly activates mTORC2 to promote cell survival during acute energetic stress. *Sci Signal* **12**

# Supplementary Figure S1

(related to Figure 1)

S1A.

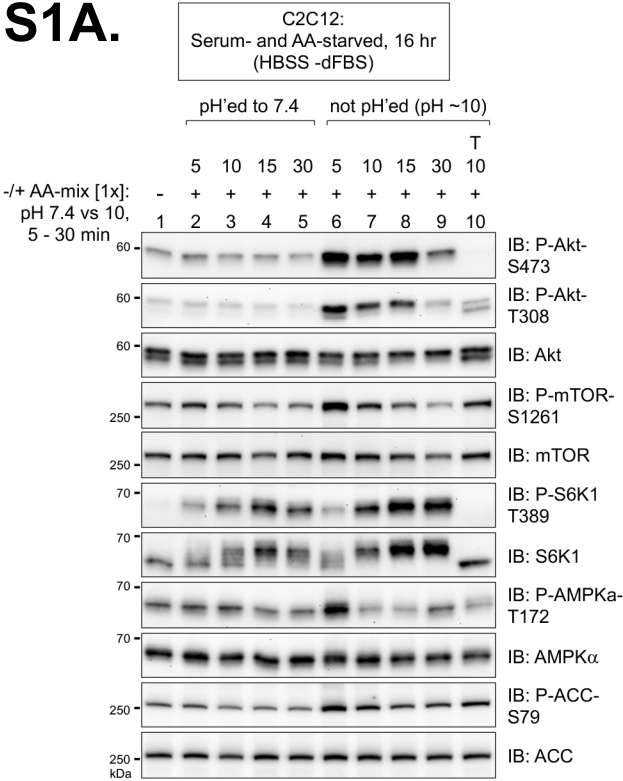

S1B.

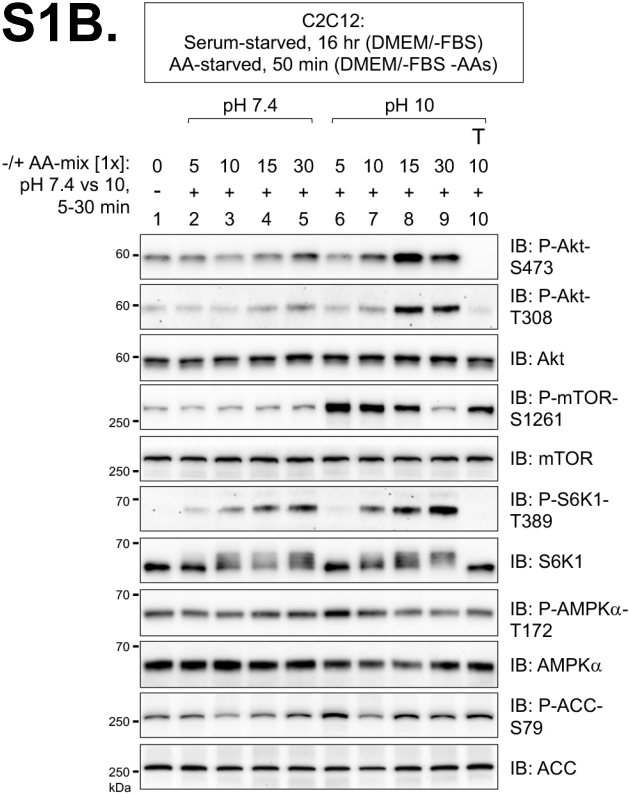

# Supplementary Figure S2

(related to Figure 2)

S2A.

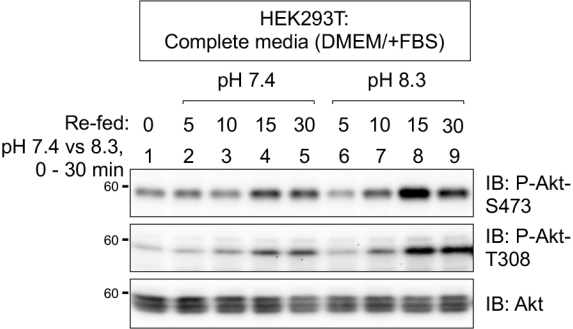

S2B.

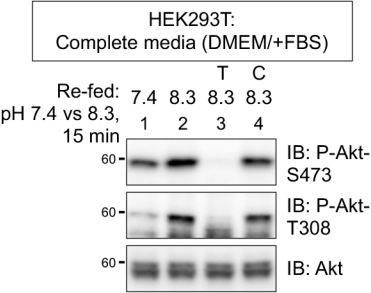

S2C.

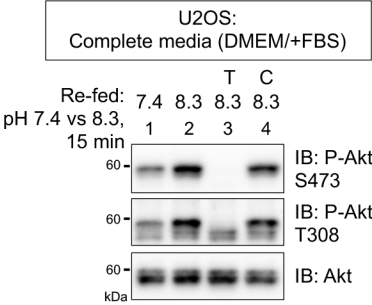

S2D.

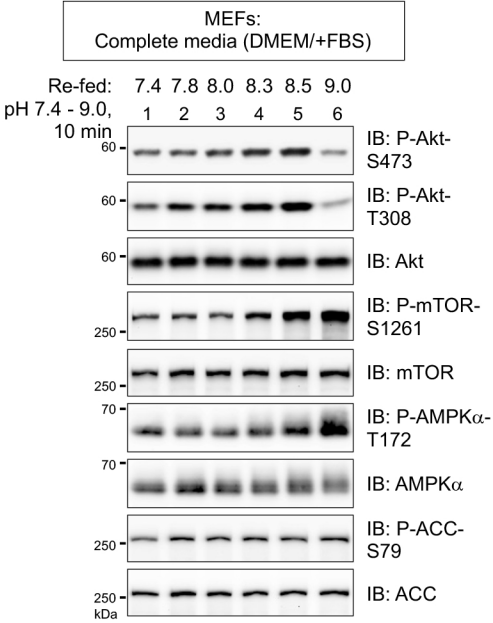

# Supplementary Figure S3

(related to Figure 4)

**S3.**

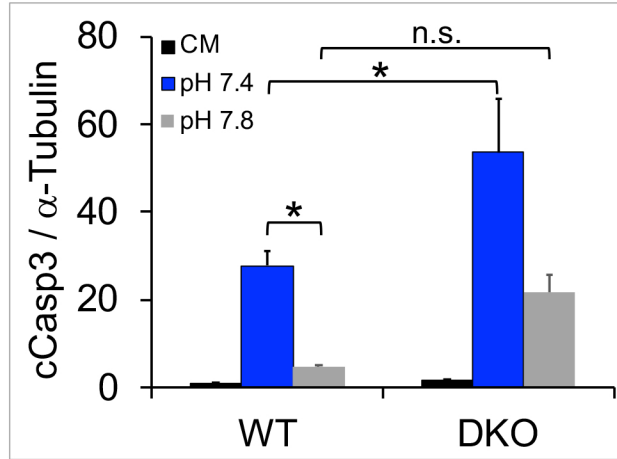

# Supplementary Figure S4

(related to Figure 4)

S4A.

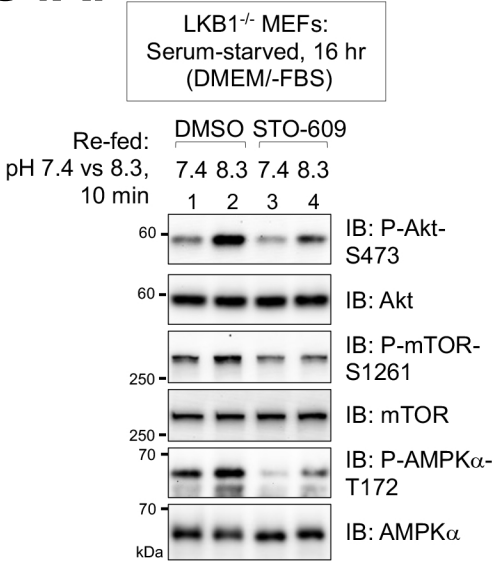

S4B.

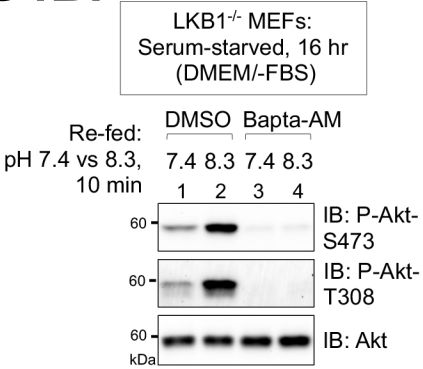

Supplement: Supplemental Experimental Procedures and Figures S1–S4 [file mmc1.pdf]
